# Supplementary material for: The composition/field-induced octahedral tilt, domain switching and improved piezoelectric properties of BF-BT ceramics during phase transition
Source: Royal Society of Chemistry journal article supplement (doi:10.1039/d4ta03949a), 2024-01-01
Supplement: d4ta03949a1.pdf [file d4ta03949a1.pdf]

### Supplementary Information

Figure 1S (a-c) is the surface SEM diagram of  $(1-x)\text{BF}-x\text{BT}$ . All samples show a uniform and dense morphology. The average grain sizes gradually decrease from  $6.29\mu\text{m}$  of  $0.7\text{BF}-0.3\text{BT}$  to  $3.09\mu\text{m}$  of  $0.5\text{BF}-0.5\text{BT}$  with increasing  $x$  (Figure 1S (d)). The decreasing grain size is attributed to the high melting point ( $1618\text{ }^\circ\text{C}$ ) of BT, which raises the densification sintering temperature, and the disorder in the crystal structure that disrupts the long-range order of the crystal arrangement. Moreover, the Energy Dispersive Spectrometer (EDS) images in Figure 2S confirm the uniform distribution of elements in  $(1-x)\text{BF}-x\text{BT}$ .

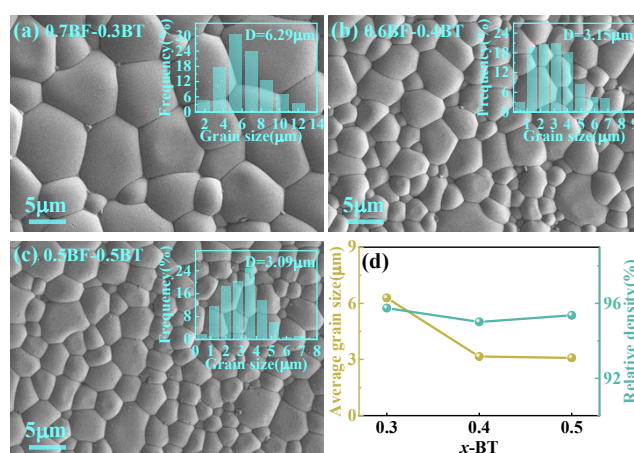

Figure 1S (a-c) Surface SEM, (d) average grain size and relative density for  $(1-x)\text{BF}-x\text{BT}$  ( $x = 0.3, 0.4, 0.5$ ).

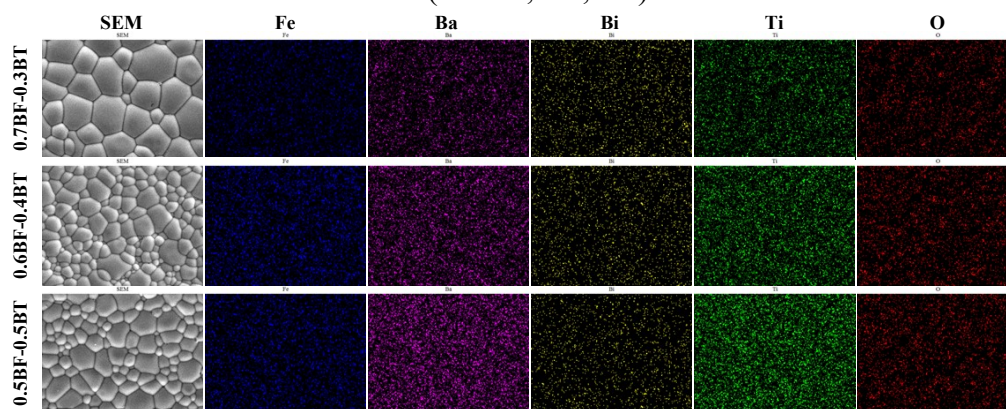

Figure 2S EDS image of  $(1-x)\text{BF}-x\text{BT}$  ( $x = 0.3, 0.4, 0.5$ ).

Figure 3S (a) shows the impedance modulus of (1-x)BF-xBT. The modulus amplitude is only observed at  $0.2 \leq x \leq 0.4$ , and the amplitude is the largest at 0.7BF-0.3BT. The resonance frequency ( $f_r$ ) and antiresonance frequency ( $f_a$ ) can be determined from the impedance modulus. The electromechanical coupling coefficient ( $k_p$ ) can be calculated by the formula:

$$\frac{1}{k_p^2} = 0.398 \frac{f_r}{f_a - f_r} + 0.579$$

As BT increases,  $k_p$  reaches its maximum value at 0.7BF-0.3BT ( $k_p = 0.28$ ). However, it is quite difficult to calculate the  $k_p$  value when  $x \geq 0.5$  (Figure 3S (b)). This is consistent with variation  $d_{33}$  as a function of  $x$ .

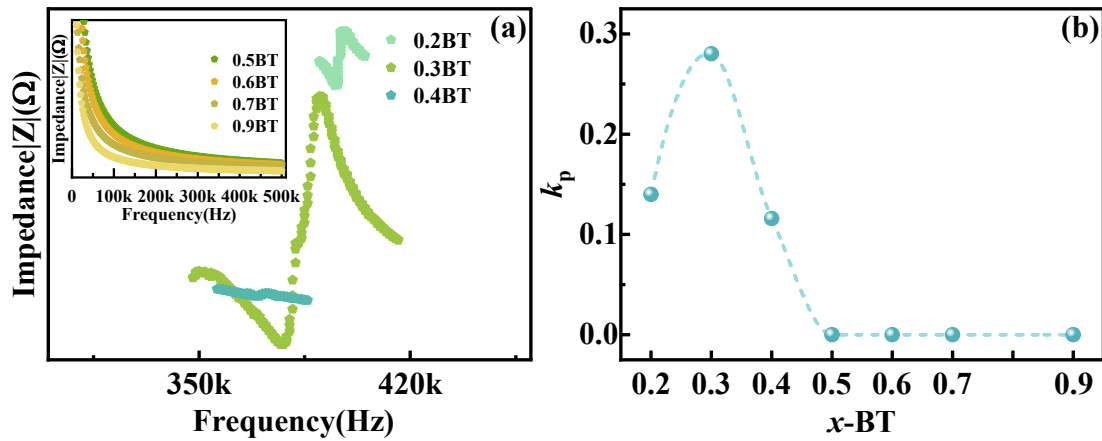

Figure 3S (a) impedance modulus and (b)  $k_p$  of (1-x)BF-xBT ( $x = 0.2 \sim 0.9$ ).
